# Supplementary material
Source: Springer Nature journal article supplement (https://www.springermedizin.de/resource/supplementary/12891_2013_1923_MOESM1_ESM.pdf/9508778)
Supplement: MOESM1 [file 9508778]

120 subjects were invited to participate during the study period of June – July/ 2012

```
graph TD; A[120 subjects were invited to participate during the study period of June – July/ 2012] --> B[108 subjects agreed to participate and met the inclusion criteria]; B --> C[8 subjects refused to do the DEXA test]; C --> D[100 subjects met the inclusion criteria and did the DEXA test.];
```

108 subjects agreed to participate and met the inclusion criteria

8 subjects refused to do the DEXA test

100 subjects met the inclusion criteria and did the DEXA test.
